# Supplementary material for: DNA language models are powerful predictors of genome-wide variant effects
Source: PubMed Central journal article supplement — Proc Natl Acad Sci U S A. 2023 Oct 26;120(44):e2311219120. doi: 10.1073/pnas.2311219120 (PMC10622914; doi:10.1073/pnas.2311219120), 2023-10-26
Supplement: pnas.2311219120.sapp.pdf [file pnas.2311219120.sapp.pdf]

# Supporting Information for

## DNA language models are powerful predictors of genome-wide variant effects

Gonzalo Benegas<sup>1</sup>, Sanjit Singh Batra<sup>2</sup>, and Yun S. Song<sup>2,3,\*</sup>

<sup>1</sup> Graduate Group in Computational Biology, University of California, Berkeley

<sup>2</sup> Computer Science Division, University of California, Berkeley

<sup>3</sup> Department of Statistics, University of California, Berkeley

This PDF file includes:

- Tables [S1-S3](#)
- Figures [S1](#) to [S12](#)

---

\*To whom correspondence should be address: [yss@berkeley.edu](mailto:yss@berkeley.edu)

## Supplementary Tables

**Table S1:** Genome assemblies used for training

| Assembly Accession | Assembly Name   | Organism Name               |
|--------------------|-----------------|-----------------------------|
| GCF_000001735.4    | TAIR10.1        | <i>Arabidopsis thaliana</i> |
| GCF_000309985.2    | CAAS_Brap_v3.01 | <i>Brassica rapa</i>        |
| GCF_000633955.1    | Cs              | <i>Camelina sativa</i>      |
| GCF_000375325.1    | Caprub1_0       | <i>Capsella rubella</i>     |
| GCF_000150535.2    | Papaya1.0       | <i>Carica papaya</i>        |
| GCF_000478725.1    | Eutsalg1_0      | <i>Eutrema salsugineum</i>  |
| GCF_000801105.1    | Rs1.0           | <i>Raphanus sativus</i>     |
| GCF_000463585.1    | ASM46358v1      | <i>Tarenaya hassleriana</i> |

**Table S2:** Test perplexity. Perplexity, defined as the exponentiation of the cross-entropy loss, is equivalent to 1 over the probability given to the correct nucleotide. *Arabidopsis thaliana* chromosomes 4 and 5 were used for validation and testing, respectively. Note that reducing the repeat weight leads to improved test perplexity in non-repetitive regions, which are often of greater interest. Compared to full down-weighting, moderate down-weighting results in a similar improvement in perplexity for non-repetitive regions without sacrificing genome-wide perplexity as much.

| Model             | Chromosome-wide | Non-repeat regions |
|-------------------|-----------------|--------------------|
| Repeat weight 1   | 2.88            | 2.99               |
| Repeat weight 0.1 | 2.90            | 2.92               |
| Repeat weight 0   | 3.03            | 2.92               |

**Table S3:** Training hyperparameters

|                                 |                                                                 |
|---------------------------------|-----------------------------------------------------------------|
| Window size (L)                 | 512                                                             |
| Repeat weight                   | 0.1                                                             |
| Embedding dimension (D)         | 512                                                             |
| Convolutional blocks            | 25                                                              |
| Convolutional kernel size       | 9                                                               |
| Convolutional dilation schedule | 1, 2, 4, 8, 16, 32, 1, 2, 4, 8, 16, 32, ...                     |
| Optimizer                       | AdamW                                                           |
| Weight decay                    | 0.01                                                            |
| Batch size                      | 2048                                                            |
| Learning rate                   | $10^{-3}$ for 120 K steps +<br>decaying (cosine) for 30 K steps |
| Learning rate warmup            | 1 K steps                                                       |

## Supplementary Figures

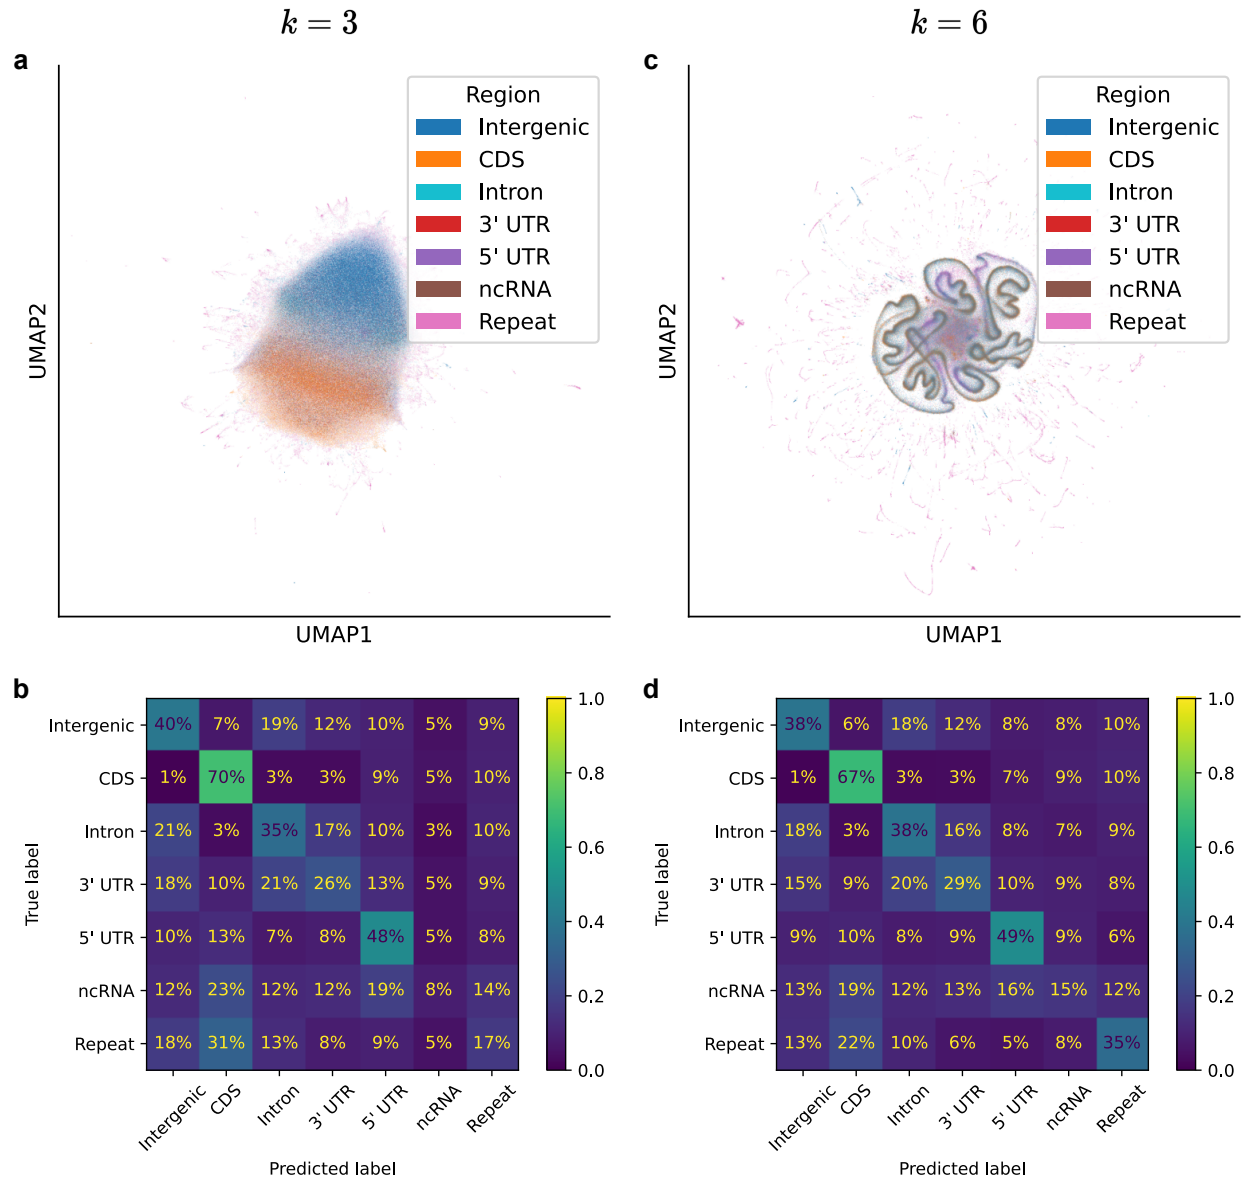

**Figure S1: UMAP visualization of  $k$ -mer spectrum of different windows, as in Fig. 2, annotated with gene region. (a,b)  $k = 3$ . (c,d)  $k = 6$ .**

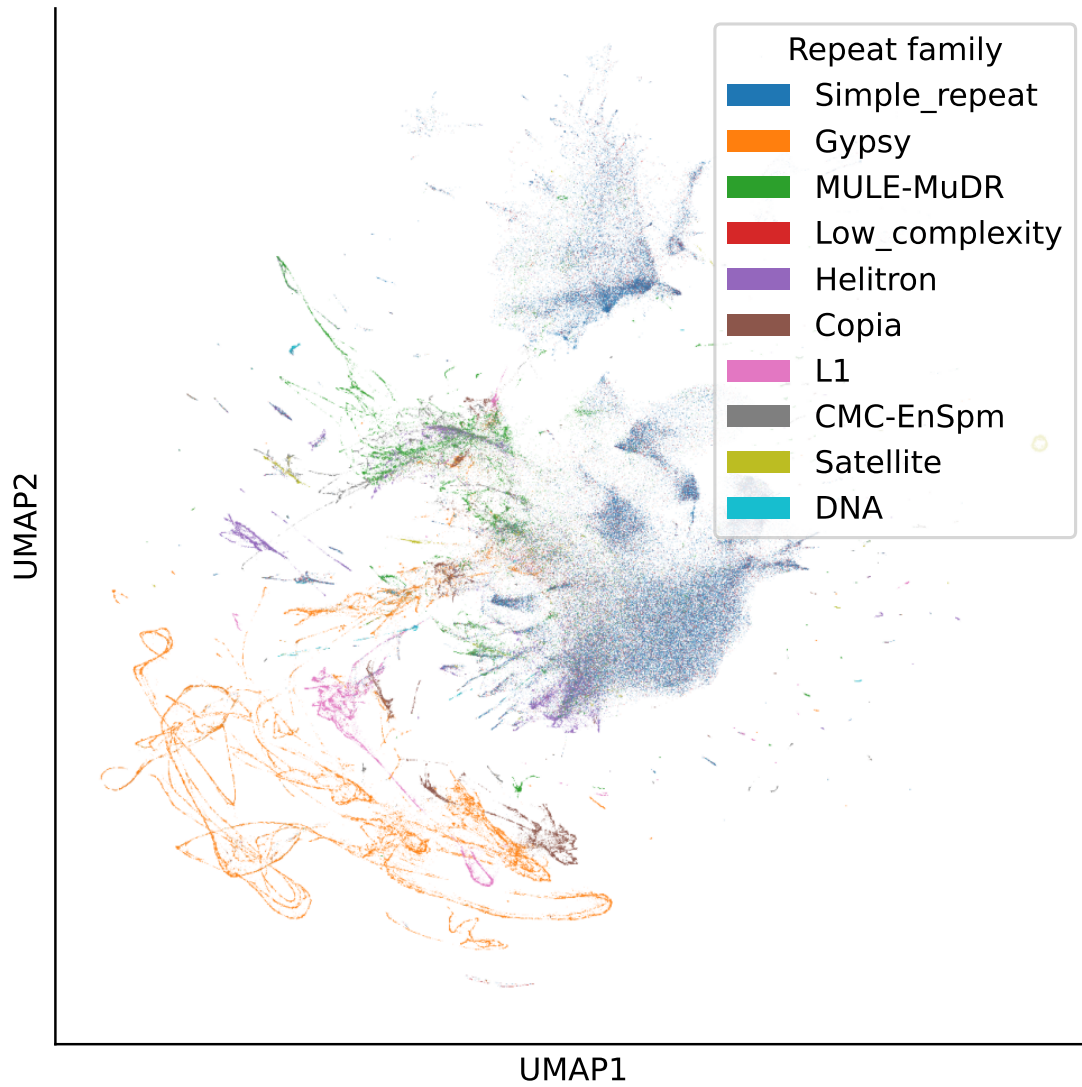

**Figure S2:** UMAP visualization of GPN embeddings, as in Fig. 2, annotated by repeat family.

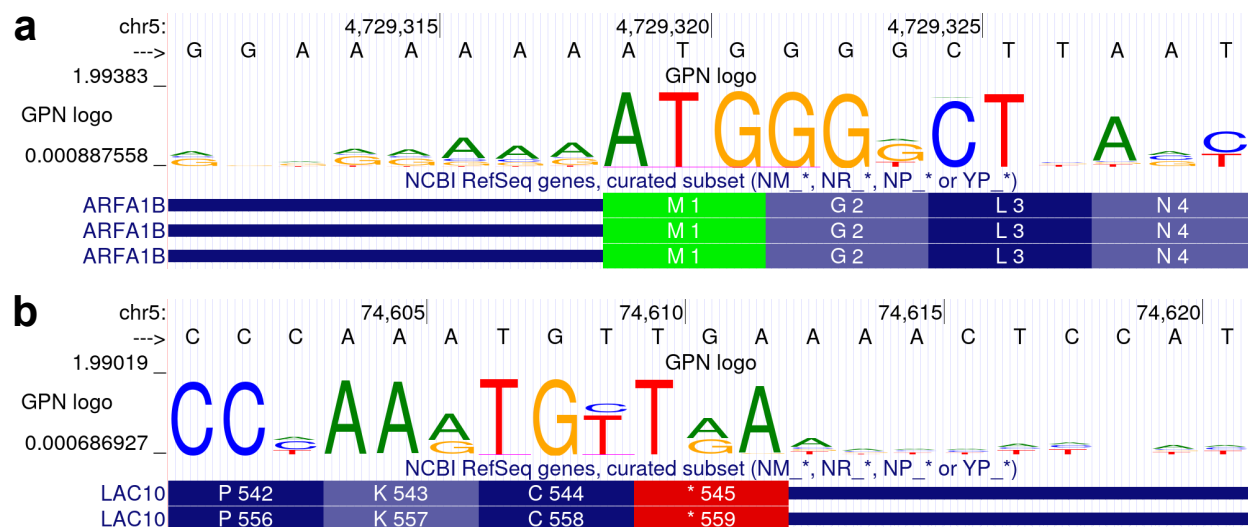

**Figure S3: Additional GPN sequence logos.** (a) Start codon. (b) Stop codon.

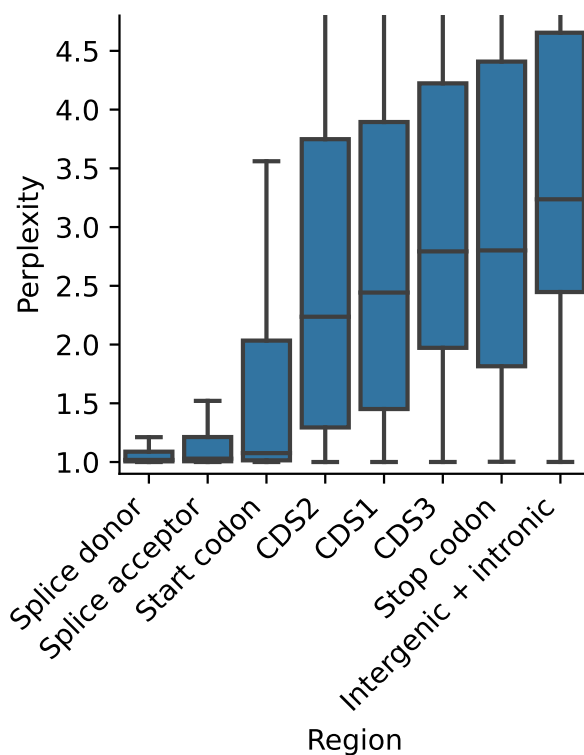

**Figure S4: Perplexity on select positions from the 1 Mb region Chr5:3,500,000-4,500,000 (test chromosome).** CDS1-3: frame within the coding sequence.

| pattern                 | num_seqlets | modisco_cwm_fwd                                                                     | modisco_cwm_rev                                                                      | match0    | qval0    | match0_logo                                                                           |
|-------------------------|-------------|-------------------------------------------------------------------------------------|--------------------------------------------------------------------------------------|-----------|----------|---------------------------------------------------------------------------------------|
| pos_patterns.pattern_0  | 5028        | 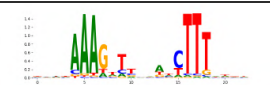   |    |           |          |                                                                                       |
| pos_patterns.pattern_1  | 4509        |    |    | AT4G38000 | 0.0      |    |
| pos_patterns.pattern_2  | 3386        |    |    | AT1G72740 | 0.000117 |    |
| pos_patterns.pattern_3  | 1658        |    |    |           |          |                                                                                       |
| pos_patterns.pattern_4  | 1611        |    |    |           |          |                                                                                       |
| pos_patterns.pattern_5  | 1556        |    |    |           |          |                                                                                       |
| pos_patterns.pattern_6  | 1490        |    |    | AT2G01930 | 0.0      |    |
| pos_patterns.pattern_7  | 1424        |    |    |           |          |                                                                                       |
| pos_patterns.pattern_8  | 1391        |   |   | AT5G18090 | 0.044918 |   |
| pos_patterns.pattern_9  | 1385        |  |  |           |          |                                                                                       |
| pos_patterns.pattern_10 | 1057        |  |  |           |          |                                                                                       |
| pos_patterns.pattern_11 | 1052        |  |  |           |          |                                                                                       |
| pos_patterns.pattern_12 | 928         |  |  |           |          |                                                                                       |
| pos_patterns.pattern_13 | 921         |  |  |           |          |                                                                                       |
| pos_patterns.pattern_14 | 844         |  |  |           |          |                                                                                       |
| pos_patterns.pattern_15 | 837         |  |  |           |          |                                                                                       |
| pos_patterns.pattern_16 | 836         |  |  | AT3G48430 | 0.000584 |  |
| pos_patterns.pattern_17 | 828         |  |  |           |          |                                                                                       |

Figure S5: Promoter motifs predicted by GPN and matching motifs in PlantTFDB.

| pattern                 | num_seqlets | modisco_cwm_fwd                                                                     | modisco_cwm_rev                                                                      | match0    | qval0    | match0_logo                                                                           |
|-------------------------|-------------|-------------------------------------------------------------------------------------|--------------------------------------------------------------------------------------|-----------|----------|---------------------------------------------------------------------------------------|
| pos_patterns.pattern_18 | 780         | 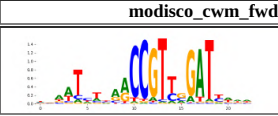   |    | AT4G24470 | 0.0      |    |
| pos_patterns.pattern_19 | 775         |    |    | AT2G41835 | 0.016114 |    |
| pos_patterns.pattern_20 | 756         |    |    |           |          |                                                                                       |
| pos_patterns.pattern_21 | 743         |    |    |           |          |                                                                                       |
| pos_patterns.pattern_22 | 729         |    |    | AT1G49560 | 0.029145 |    |
| pos_patterns.pattern_23 | 708         |    |    |           |          |                                                                                       |
| pos_patterns.pattern_24 | 702         |   |   |           |          |                                                                                       |
| pos_patterns.pattern_25 | 696         |  |  |           |          |                                                                                       |
| pos_patterns.pattern_26 | 688         |  |  |           |          |                                                                                       |
| pos_patterns.pattern_27 | 674         |  |  |           |          |                                                                                       |
| pos_patterns.pattern_28 | 643         |  |  | AT2G36610 | 0.026016 |  |
| pos_patterns.pattern_29 | 640         |  |  |           |          |                                                                                       |
| pos_patterns.pattern_30 | 631         |  |  |           |          |                                                                                       |
| pos_patterns.pattern_31 | 631         |  |  |           |          |                                                                                       |
| pos_patterns.pattern_32 | 630         |  |  |           |          |                                                                                       |
| pos_patterns.pattern_33 | 604         |  |  | AT3G58630 | 0.029229 |  |
| pos_patterns.pattern_34 | 595         |  |  |           |          |                                                                                       |
| pos_patterns.pattern_35 | 595         |  |  |           |          |                                                                                       |

Figure S5: (Continued)



| pattern                 | num_seqlets | modisco_cwm_fwd | modisco_cwm_rev | match0    | qval0    | match0_logo |
|-------------------------|-------------|-----------------|-----------------|-----------|----------|-------------|
| pos_patterns.pattern_36 | 590         |                 |                 | AT3G28920 | 0.000035 |             |
| pos_patterns.pattern_37 | 580         |                 |                 |           |          |             |
| pos_patterns.pattern_38 | 566         |                 |                 |           |          |             |
| pos_patterns.pattern_39 | 558         |                 |                 |           |          |             |
| pos_patterns.pattern_40 | 544         |                 |                 |           |          |             |
| pos_patterns.pattern_41 | 523         |                 |                 |           |          |             |
| pos_patterns.pattern_42 | 512         |                 |                 | AT3G10480 | 0.000001 |             |
| pos_patterns.pattern_43 | 511         |                 |                 |           |          |             |
| pos_patterns.pattern_44 | 508         |                 |                 |           |          |             |
| pos_patterns.pattern_45 | 506         |                 |                 |           |          |             |
| pos_patterns.pattern_46 | 492         |                 |                 | AT2G28810 | 0.000187 |             |
| pos_patterns.pattern_47 | 480         |                 |                 |           |          |             |
| pos_patterns.pattern_48 | 480         |                 |                 |           |          |             |
| pos_patterns.pattern_49 | 477         |                 |                 | AT4G38000 | 0.002972 |             |
| pos_patterns.pattern_50 | 454         |                 |                 | AT4G24470 | 0.000033 |             |
| pos_patterns.pattern_51 | 451         |                 |                 | AT3G10800 | 0.025896 |             |
| pos_patterns.pattern_52 | 433         |                 |                 |           |          |             |
| pos_patterns.pattern_53 | 426         |                 |                 |           |          |             |

Figure S5: (Continued)



| pattern                 | num_seqlets | modisco_cwm_fwd | modisco_cwm_rev | match0    | qval0    | match0_logo |
|-------------------------|-------------|-----------------|-----------------|-----------|----------|-------------|
| pos_patterns.pattern_54 | 407         |                 |                 | AT2G01930 | 0.002768 |             |
| pos_patterns.pattern_55 | 404         |                 |                 |           |          |             |
| pos_patterns.pattern_56 | 387         |                 |                 | AT4G34000 | 0.000455 |             |
| pos_patterns.pattern_57 | 357         |                 |                 | AT5G42520 | 0.037446 |             |
| pos_patterns.pattern_58 | 354         |                 |                 | AT1G69570 | 0.0      |             |
| pos_patterns.pattern_59 | 352         |                 |                 | AT3G62420 | 0.000053 |             |
| pos_patterns.pattern_60 | 322         |                 |                 |           |          |             |
| pos_patterns.pattern_61 | 319         |                 |                 |           |          |             |
| pos_patterns.pattern_62 | 314         |                 |                 |           |          |             |
| pos_patterns.pattern_63 | 311         |                 |                 |           |          |             |
| pos_patterns.pattern_64 | 309         |                 |                 |           |          |             |
| pos_patterns.pattern_65 | 302         |                 |                 | AT1G21910 | 0.0      |             |
| pos_patterns.pattern_66 | 293         |                 |                 |           |          |             |
| pos_patterns.pattern_67 | 291         |                 |                 | AT2G33860 | 0.005094 |             |
| pos_patterns.pattern_68 | 285         |                 |                 |           |          |             |
| pos_patterns.pattern_69 | 282         |                 |                 |           |          |             |
| pos_patterns.pattern_70 | 280         |                 |                 |           |          |             |
| pos_patterns.pattern_71 | 280         |                 |                 | AT1G53170 | 0.001163 |             |

Figure S5: (Continued)

| pattern                 | num_seqlets | modisco_cwm_fwd | modisco_cwm_rev | match0    | qval0    | match0_logo |
|-------------------------|-------------|-----------------|-----------------|-----------|----------|-------------|
| pos_patterns.pattern_72 | 275         |                 |                 |           |          |             |
| pos_patterns.pattern_73 | 265         |                 |                 |           |          |             |
| pos_patterns.pattern_74 | 263         |                 |                 |           |          |             |
| pos_patterns.pattern_75 | 262         |                 |                 |           |          |             |
| pos_patterns.pattern_76 | 259         |                 |                 |           |          |             |
| pos_patterns.pattern_77 | 253         |                 |                 |           |          |             |
| pos_patterns.pattern_78 | 249         |                 |                 |           |          |             |
| pos_patterns.pattern_79 | 248         |                 |                 |           |          |             |
| pos_patterns.pattern_80 | 242         |                 |                 | AT1G49480 | 0.000331 |             |
| pos_patterns.pattern_81 | 228         |                 |                 | AT5G67580 | 0.016528 |             |
| pos_patterns.pattern_82 | 225         |                 |                 |           |          |             |
| pos_patterns.pattern_83 | 221         |                 |                 |           |          |             |
| pos_patterns.pattern_84 | 215         |                 |                 |           |          |             |
| pos_patterns.pattern_85 | 209         |                 |                 |           |          |             |
| pos_patterns.pattern_86 | 206         |                 |                 |           |          |             |
| pos_patterns.pattern_87 | 199         |                 |                 |           |          |             |
| pos_patterns.pattern_88 | 198         |                 |                 |           |          |             |
| pos_patterns.pattern_89 | 194         |                 |                 | AT3G22170 | 0.002435 |             |

Figure S5: (Continued)

| pattern                  | num_seqlets | modisco_cwm_fwd | modisco_cwm_rev | match0    | qval0    | match0_logo |
|--------------------------|-------------|-----------------|-----------------|-----------|----------|-------------|
| pos_patterns.pattern_90  | 186         |                 |                 |           |          |             |
| pos_patterns.pattern_91  | 169         |                 |                 |           |          |             |
| pos_patterns.pattern_92  | 167         |                 |                 |           |          |             |
| pos_patterns.pattern_93  | 167         |                 |                 |           |          |             |
| pos_patterns.pattern_94  | 167         |                 |                 |           |          |             |
| pos_patterns.pattern_95  | 159         |                 |                 | AT4G38000 | 0.005238 |             |
| pos_patterns.pattern_96  | 158         |                 |                 |           |          |             |
| pos_patterns.pattern_97  | 157         |                 |                 |           |          |             |
| pos_patterns.pattern_98  | 157         |                 |                 |           |          |             |
| pos_patterns.pattern_99  | 156         |                 |                 |           |          |             |
| pos_patterns.pattern_100 | 154         |                 |                 |           |          |             |
| pos_patterns.pattern_101 | 151         |                 |                 |           |          |             |
| pos_patterns.pattern_102 | 146         |                 |                 |           |          |             |
| pos_patterns.pattern_103 | 136         |                 |                 |           |          |             |
| pos_patterns.pattern_104 | 135         |                 |                 |           |          |             |
| pos_patterns.pattern_105 | 135         |                 |                 | AT5G02840 | 0.041659 |             |
| pos_patterns.pattern_106 | 131         |                 |                 |           |          |             |
| pos_patterns.pattern_107 | 131         |                 |                 |           |          |             |

Figure S5: (Continued)

| pattern                  | num_seqlets | modisco_cwm_fwd | modisco_cwm_rev | match0    | qval0    | match0_logo |
|--------------------------|-------------|-----------------|-----------------|-----------|----------|-------------|
| pos_patterns.pattern_108 | 130         |                 |                 |           |          |             |
| pos_patterns.pattern_109 | 128         |                 |                 |           |          |             |
| pos_patterns.pattern_110 | 126         |                 |                 |           |          |             |
| pos_patterns.pattern_111 | 125         |                 |                 |           |          |             |
| pos_patterns.pattern_112 | 121         |                 |                 |           |          |             |
| pos_patterns.pattern_113 | 117         |                 |                 |           |          |             |
| pos_patterns.pattern_114 | 115         |                 |                 |           |          |             |
| pos_patterns.pattern_115 | 107         |                 |                 | AT2G20110 | 0.049803 |             |
| pos_patterns.pattern_116 | 106         |                 |                 |           |          |             |
| pos_patterns.pattern_117 | 105         |                 |                 |           |          |             |
| pos_patterns.pattern_118 | 105         |                 |                 | AT3G55370 | 0.025597 |             |
| pos_patterns.pattern_119 | 104         |                 |                 |           |          |             |
| pos_patterns.pattern_120 | 103         |                 |                 |           |          |             |
| pos_patterns.pattern_121 | 102         |                 |                 |           |          |             |
| pos_patterns.pattern_122 | 100         |                 |                 | AT3G22170 | 0.007859 |             |
| pos_patterns.pattern_123 | 96          |                 |                 |           |          |             |
| pos_patterns.pattern_124 | 93          |                 |                 | AT4G24470 | 0.000435 |             |
| pos_patterns.pattern_125 | 91          |                 |                 | AT3G10500 | 0.000013 |             |

Figure S5: (Continued)



| pattern                  | num_seqlets | modisco_cwm_fwd                                                                     | modisco_cwm_rev                                                                      | match0    | qval0    | match0_logo                                                                           |
|--------------------------|-------------|-------------------------------------------------------------------------------------|--------------------------------------------------------------------------------------|-----------|----------|---------------------------------------------------------------------------------------|
| pos_patterns.pattern_126 | 88          |    |    |           |          |                                                                                       |
| pos_patterns.pattern_127 | 88          |    |    |           |          |                                                                                       |
| pos_patterns.pattern_128 | 87          |    |    |           |          |                                                                                       |
| pos_patterns.pattern_129 | 86          |    |    | AT2G01930 | 0.007347 |    |
| pos_patterns.pattern_130 | 80          |    |    |           |          |                                                                                       |
| pos_patterns.pattern_131 | 79          |    |    |           |          |                                                                                       |
| pos_patterns.pattern_132 | 75          |    |    |           |          |                                                                                       |
| pos_patterns.pattern_133 | 72          |    |    |           |          |                                                                                       |
| pos_patterns.pattern_134 | 67          |   |   |           |          |                                                                                       |
| pos_patterns.pattern_135 | 63          |  |  |           |          |                                                                                       |
| pos_patterns.pattern_136 | 61          |  |  | AT5G23280 | 0.000262 |  |
| pos_patterns.pattern_137 | 61          |  |  |           |          |                                                                                       |
| pos_patterns.pattern_138 | 61          |  |  |           |          |                                                                                       |
| pos_patterns.pattern_139 | 56          |  |  |           |          |                                                                                       |
| pos_patterns.pattern_140 | 55          |  |  |           |          |                                                                                       |
| pos_patterns.pattern_141 | 54          |  |  | AT3G10030 | 0.000039 |  |
| pos_patterns.pattern_142 | 52          |  |  | AT1G67260 | 0.031614 |  |
| pos_patterns.pattern_143 | 52          |  |  |           |          |                                                                                       |

Figure S5: (Continued)

| pattern                  | num_seqlets | modisco_cwm_fwd                                                                     | modisco_cwm_rev                                                                      | match0    | qval0    | match0_logo                                                                           |
|--------------------------|-------------|-------------------------------------------------------------------------------------|--------------------------------------------------------------------------------------|-----------|----------|---------------------------------------------------------------------------------------|
| pos_patterns.pattern_144 | 49          |    |    |           |          |                                                                                       |
| pos_patterns.pattern_145 | 49          |    |    |           |          |                                                                                       |
| pos_patterns.pattern_146 | 45          |    |    |           |          |                                                                                       |
| pos_patterns.pattern_147 | 41          |    |    |           |          |                                                                                       |
| pos_patterns.pattern_148 | 40          |    |    | AT4G34000 | 0.002944 |    |
| pos_patterns.pattern_149 | 39          |    |    |           |          |                                                                                       |
| pos_patterns.pattern_150 | 35          |    |    |           |          |                                                                                       |
| pos_patterns.pattern_151 | 35          |   |   |           |          |                                                                                       |
| pos_patterns.pattern_152 | 32          |  |  |           |          |                                                                                       |
| pos_patterns.pattern_153 | 29          |  |  |           |          |                                                                                       |
| pos_patterns.pattern_154 | 28          |  |  | AT2G45660 | 0.02262  |  |
| pos_patterns.pattern_155 | 28          |  |  |           |          |                                                                                       |
| pos_patterns.pattern_156 | 28          |  |  |           |          |                                                                                       |
| pos_patterns.pattern_157 | 27          |  |  |           |          |                                                                                       |
| pos_patterns.pattern_158 | 27          |  |  |           |          |                                                                                       |
| pos_patterns.pattern_159 | 26          |  |  |           |          |                                                                                       |
| pos_patterns.pattern_160 | 26          |  |  |           |          |                                                                                       |
| pos_patterns.pattern_161 | 23          |  |  |           |          |                                                                                       |

Figure S5: (Continued)



| pattern                  | num_seqlets | modisco_cwm_fwd                                                                   | modisco_cwm_rev                                                                    | match0 | qval0 | match0_logo |
|--------------------------|-------------|-----------------------------------------------------------------------------------|------------------------------------------------------------------------------------|--------|-------|-------------|
| pos_patterns.pattern_162 | 23          | 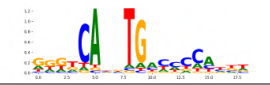 |  |        |       |             |
| pos_patterns.pattern_163 | 22          |  |  |        |       |             |

Figure S5: (Continued)

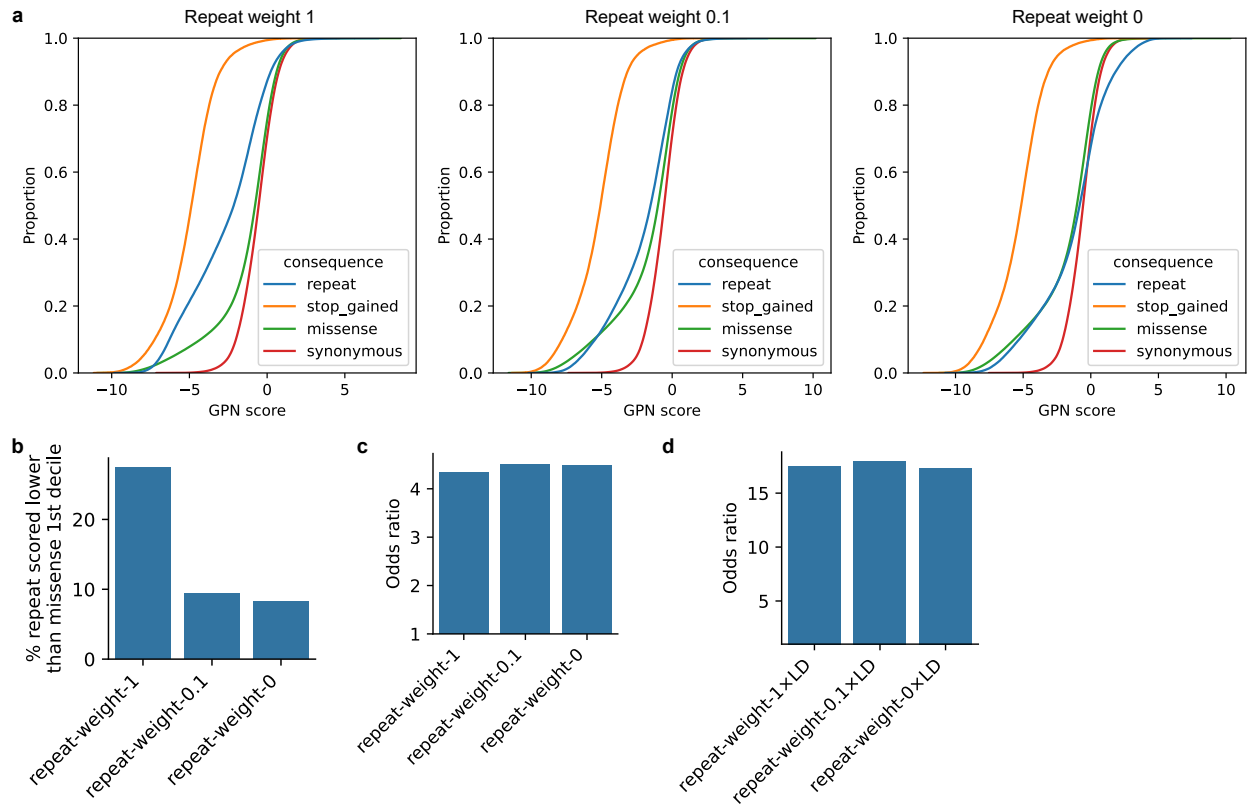

**Figure S6: Comparison of GPN models trained with different loss weights on repeats.** (a) Cumulative distribution function of GPN scores for simulated variants in specific categories, as described in Fig. 4. (b) Percentage of simulated repeat variants scored lower than the first decile of simulated missense variants. (c) Odds ratios for rare ( $AC = 1$ ) vs. common ( $AF \geq 5\%$ ) variants, as described in Fig. 5c. AC: allele count. AF: allele frequency. (d) Odds ratios for GWAS hits, as described in Fig. 6c.

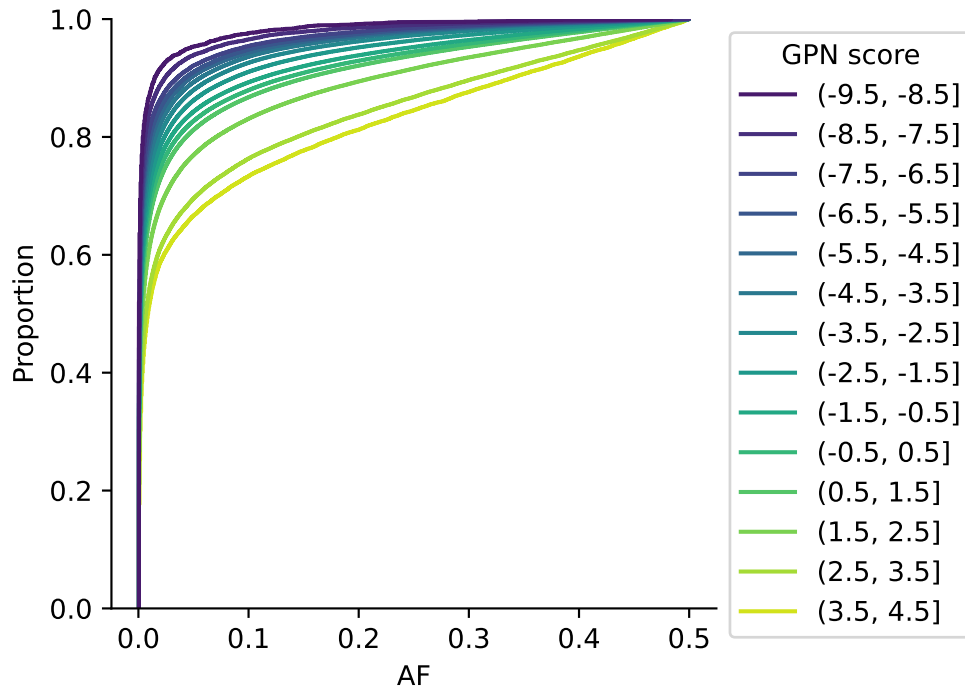

Figure S7: Cumulative distribution function of allele frequency (AF) for variants in different GPN score bins, as described in Fig. 5b.

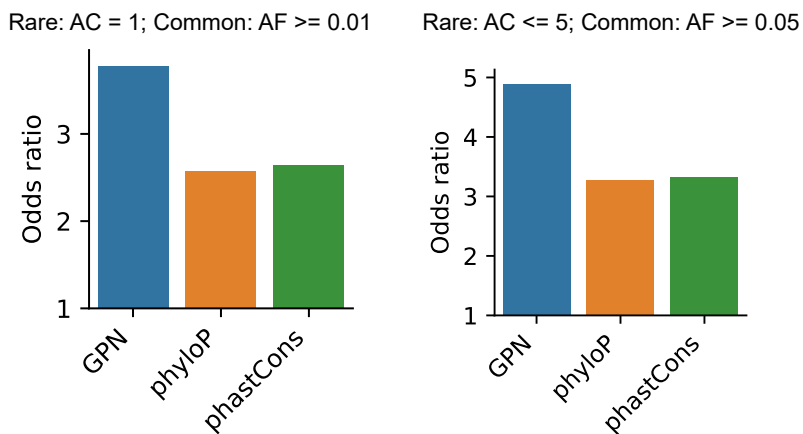

Figure S8: Rare vs. common odds ratios for different thresholds for defining rare and common variants. Odds ratios (OR) were calculated as described in Fig. 5c.

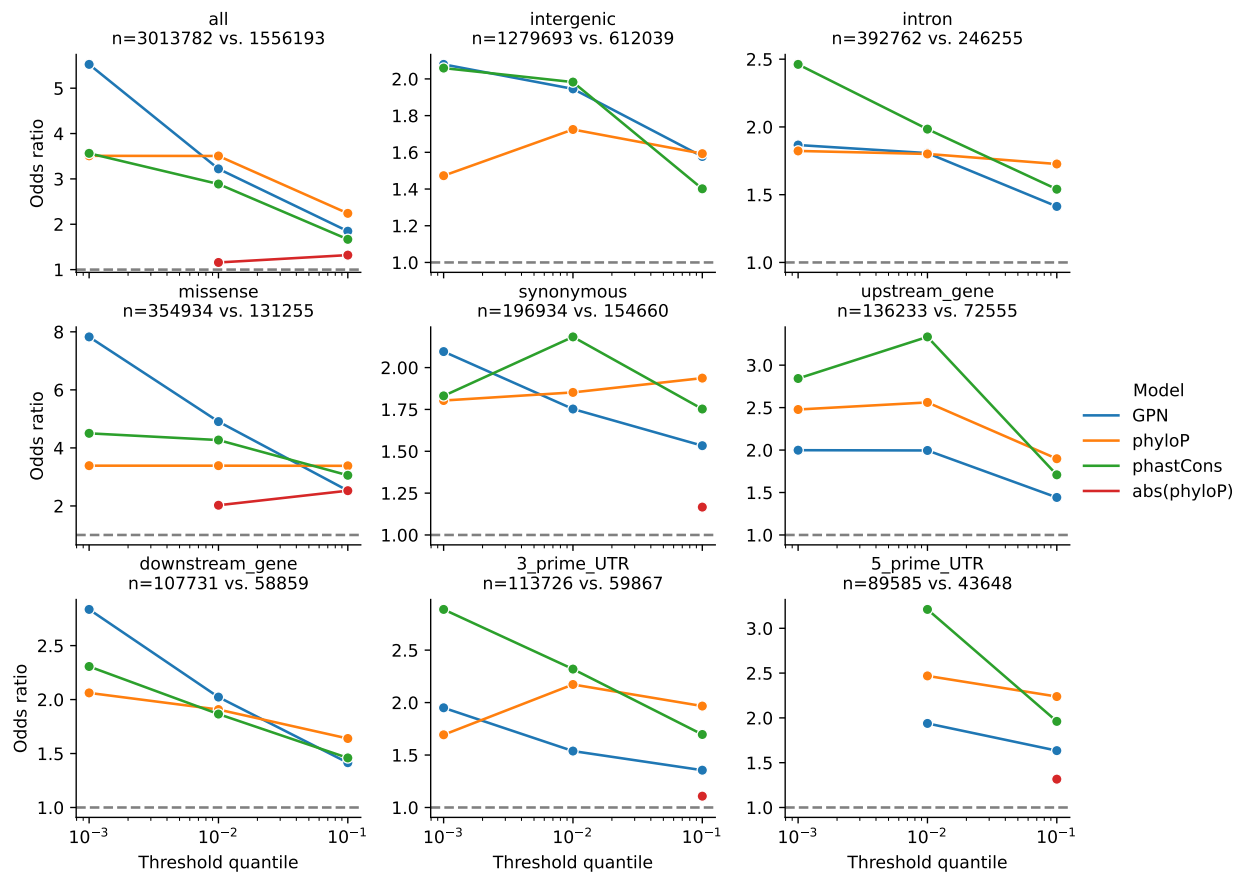

**Figure S9: Rare vs. common odds ratios for specific variant categories and different thresholds for defining functional scores.** Odds ratios (OR) were calculated as described in Fig. 5c. Only significant odds ratios are shown. The most stringent threshold in 5' UTR was excluded due to certain models having less than 10 counts in an entry of the contingency table.

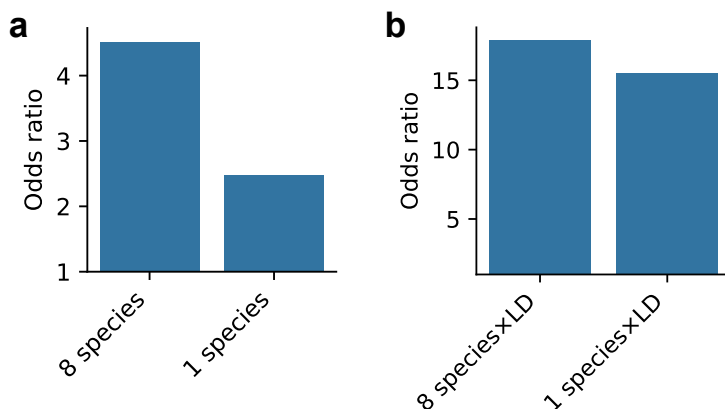

**Figure S10: Comparison of GPN models trained on a different number of species.** (a) Odds ratios for rare ( $AC = 1$ ) vs. common ( $AF \geq 5\%$ ), as described in Fig. 5c. AC: allele count. AF: allele frequency. (b) Odds ratios for GWAS hits, as described in Fig. 6c.

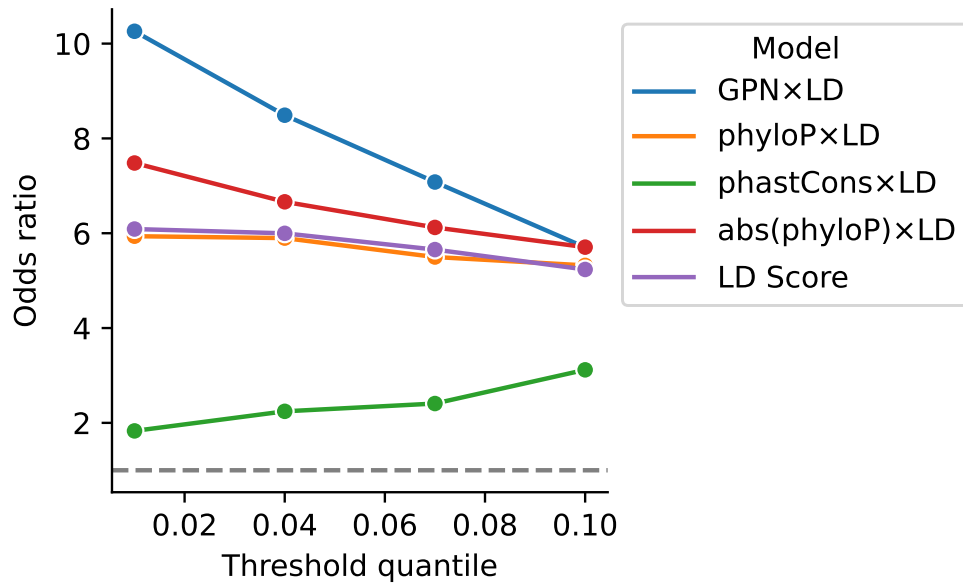

**Figure S11: GWAS hit odds ratios for different thresholds for defining functional-tagged scores.** Odds ratios (OR) were calculated as described in Fig. 6c.

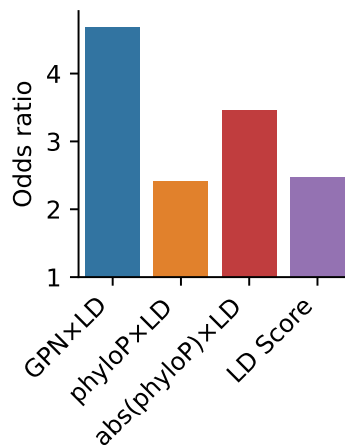

**Figure S12: Odds ratios for GWAS hits, using the Bonferroni correction instead of permutation-based significance threshold, as described in Fig. 6c.** Only significant odds ratios are shown.
